# Supplementary material
Source: PubMed Central journal article supplement (PMC2887745)
Supplement: NIHMS115650-supplement-1.pdf [file NIHMS115650-supplement-1.pdf]

# **Loss of the Alox5 gene impairs leukemia stem cells and prevents chronic myeloid leukemia**

Yaoyu Chen<sup>1</sup>, Yiguo Hu<sup>2</sup>, Haojian Zhang<sup>1</sup>, Cong Peng<sup>1</sup> & Shaoguang Li<sup>1</sup>

<sup>1</sup>Division of Hematology/Oncology, Department of Medicine, University of Massachusetts Medical School, 364 Plantation Street, Worcester, MA 01605, USA

<sup>2</sup>Current address: Dana-Farber Cancer Institute, Harvard Medical School, 44 Binney Street, Mayer 557, Boston, MA 02115, USA

## **CONTENTS:**

Supplementary Figure 1

Supplementary Figure 2

Supplementary Figure 3

Supplementary Figure 4

Supplementary Figure 5

Supplementary Figure 6

Supplementary Figure 7

Supplementary Figure 8

Supplementary Figure 9

Supplementary Table 1

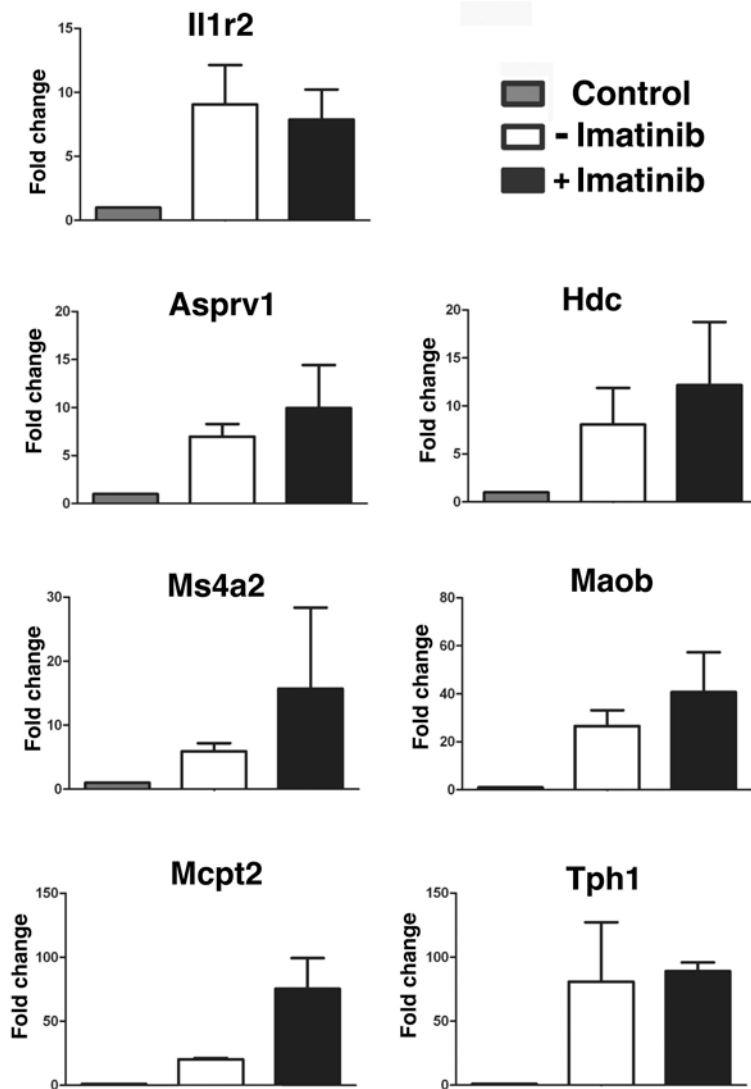

**Supplementary Fig. 1. Genes that are up-regulated by BCR-ABL in LSCs and not changed in expression following imatinib treatment.** Bone marrow cells from C57BL/6 mice (B6) were transduced with retrovirus containing BCR-ABL/GFP or GFP alone to induce CML as described in **Figure 1a**. A group of these mice were treated with imatinib as described in **Figure 1a**. Bone marrow cells were isolated from the mice, and were sorted by FACS for GFP<sup>+</sup>Lin<sup>-</sup>c-Kit<sup>+</sup>Sca-1<sup>+</sup> cells. Total RNA was isolated from these sorted cells for comparing *Alox5* expression between GFP vector-transduced normal stem cells and BCR-ABL-transduced LSCs by DNA microarray.

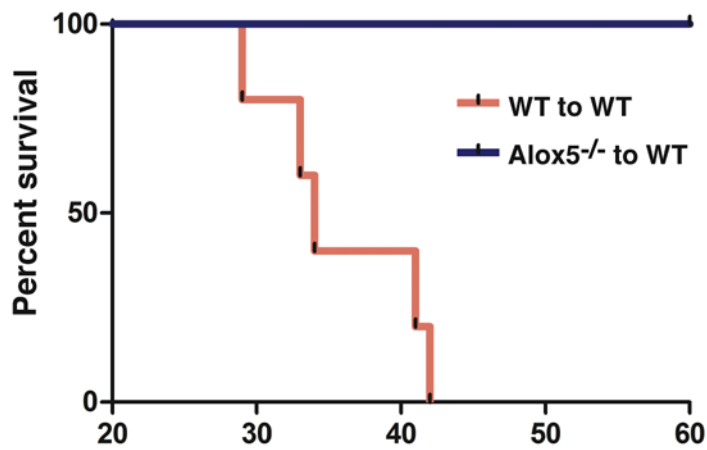

**Supplementary Fig. 2. Loss of *Alox5* causes failure of BCR-ABL-expressing BM cells to induce CML in secondary recipient mice.** Kaplan-Meier survival curves for secondary recipients of  $2 \times 10^6$  bone marrow cells from mice receiving *BCR-ABL*-transduced wild type (n=5) or *Alox5*<sup>-/-</sup> (n=6) donor BM cells.

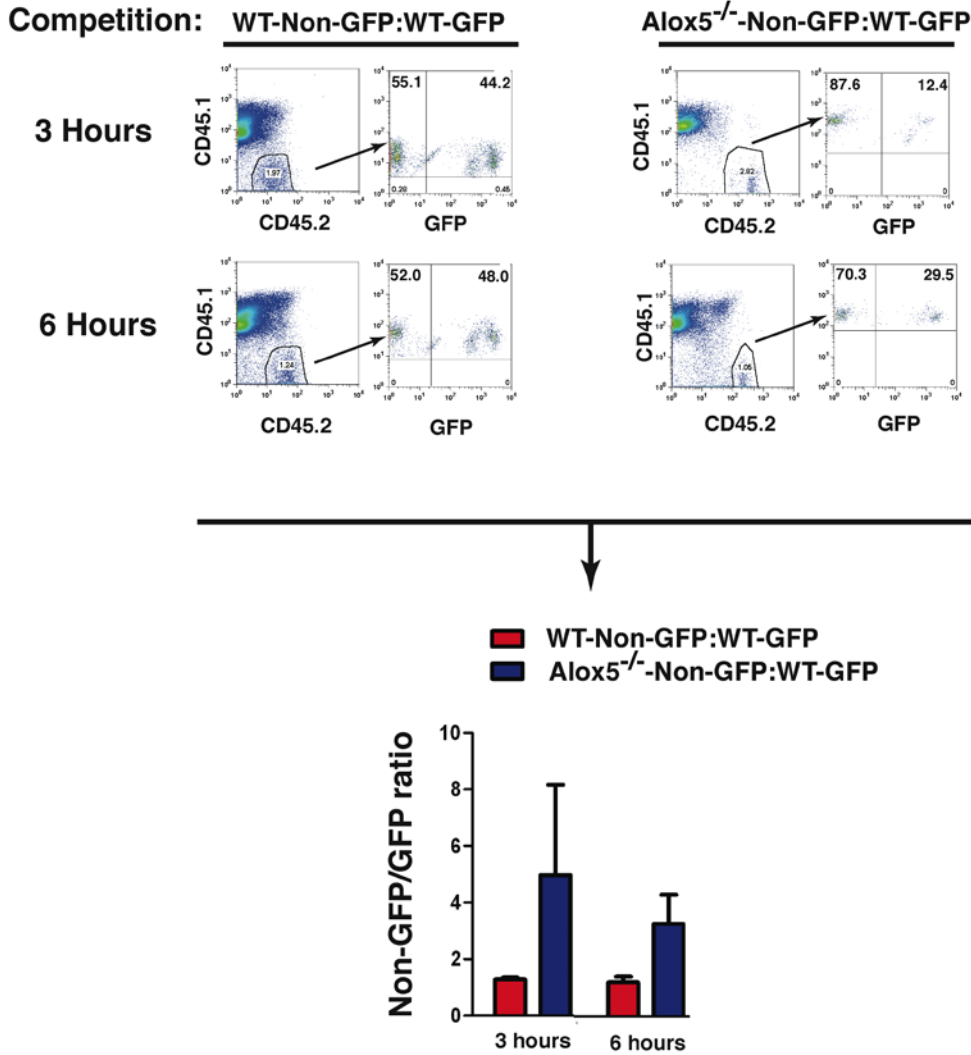

**Supplementary Fig. 3. *Alox5*<sup>-/-</sup> bone marrow cells do not have a homing defect.** Bone marrow cells ( $6 \times 10^6$ ) from GFP mice (CD45.2) were 1:1 mixed with either bone marrow cells from wild type B6 mice (CD45.2) or those from *Alox5*<sup>-/-</sup> mice (CD45.2), and then transferred by tail vein injection into each wild type recipient mouse (CD45.1). 3 or 6 hours after the transplantation, By FACS analysis, CD45.2<sup>+</sup> bone marrow cells, representing the donor cells, were first identified and then analyzed for the percentages of GFP<sup>+</sup> and GFP<sup>-</sup> populations. The ration of non-GFP and GFP populations were shown.

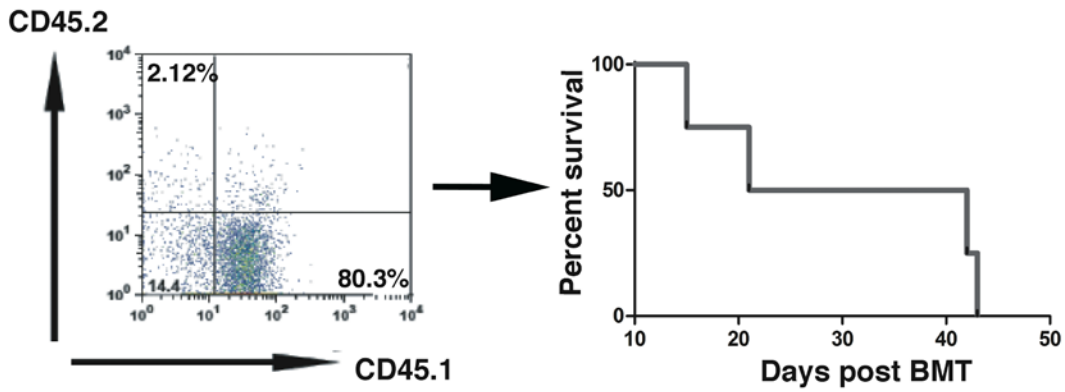

**Supplementary Fig. 4. Loss of *Alox5* impairs the function of LSCs.** BCR-ABL-expressing wild type (CD45.1<sup>+</sup>) and *Alox5*<sup>-/-</sup> (CD45.2<sup>+</sup>) BM cells were 1:1 mixed ( $5 \times 10^5$  each), followed by transplantation into lethally irradiated recipient mice. At 40 day after BMT, more than 80% of cells in PB were wild type (CD45.1<sup>+</sup>) leukaemia cells, and all these mice died of CML.

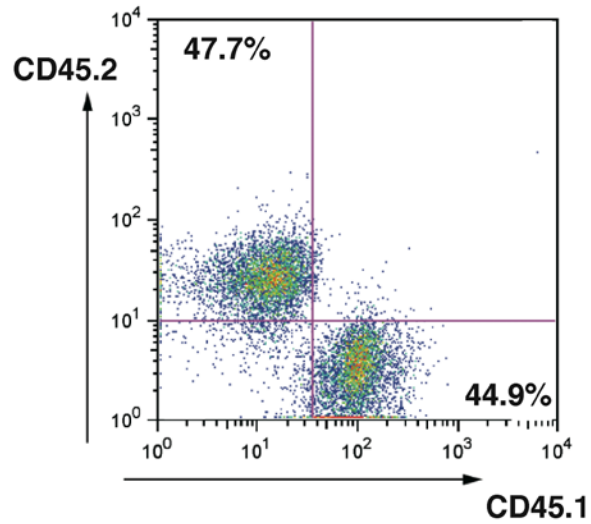

**Supplementary Fig. 5. Loss of Alox5 does not impair the function of normal stem cells.** Alox5<sup>-/-</sup> (CD45.2) and wild type (CD45.1) BM cells were 1:1 mixed and then transferred into lethal recipient mice. 4 weeks after BMT, FACS analysis was carried out to compare the percentages of wild type and Alox5<sup>-/-</sup> cells in BM of the recipient mice.

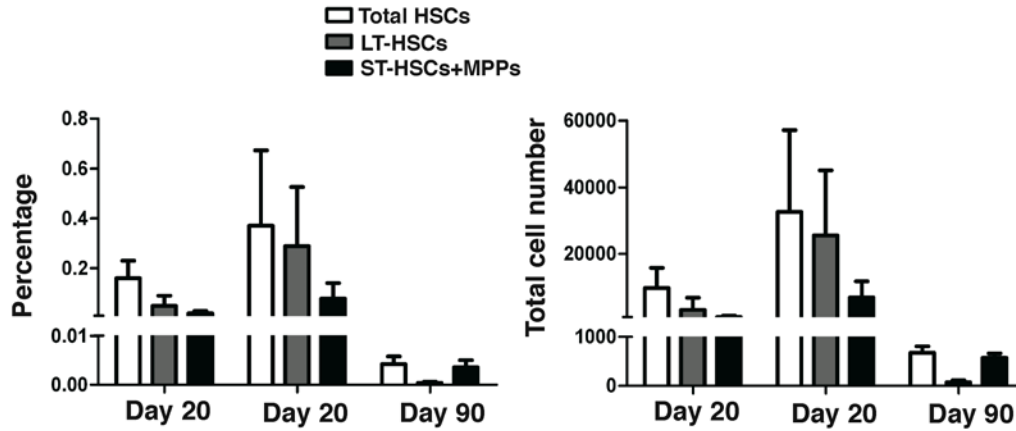

**Supplementary Fig. 6. *Alox5* deficiency does not lead to blockade of differentiation of normal LT-HSCs.** Bone marrow cells were isolated from recipients of *BCR-ABL*-transduced bone marrow cells from wild type or *Alox5*<sup>-/-</sup> donor mice, and GFP<sup>-</sup> cell population (representing normal hematopoietic cells in CML mice) were analyzed by FACS analysis. At 90 days after induction of CML, the percentages and total numbers of LT-HSCs (GFP<sup>-</sup>Lin<sup>-</sup>c-Kit<sup>+</sup>Sca-1<sup>+</sup>CD34<sup>-</sup>) were much lower than those of ST-HSCs /MPP cells (GFP<sup>-</sup>Lin<sup>-</sup>c-Kit<sup>+</sup>Sca-1<sup>+</sup>CD34<sup>+</sup>) in a similar degree in mice receiving either *BCR-ABL*-transduced wild type or *Alox5*<sup>-/-</sup> donor bone marrow cells. These results indicate that *Alox5* deficiency does not lead to blockade of differentiation of normal LT-HSCs.

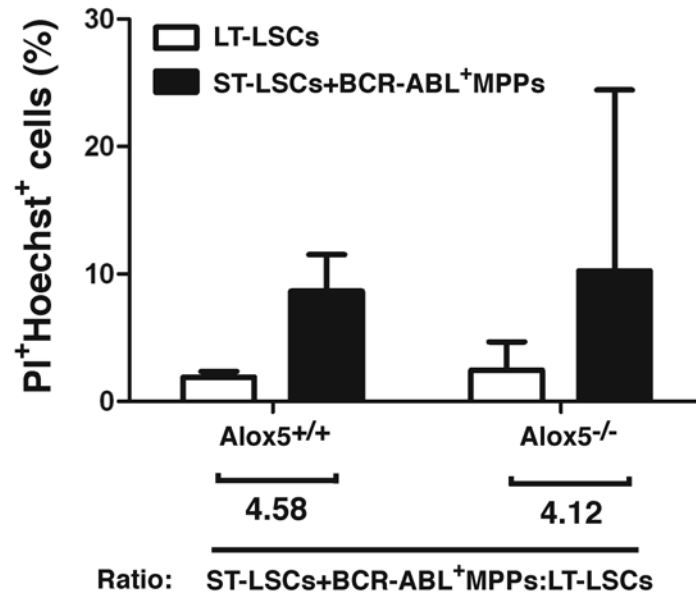

**Supplementary Fig. 7. Analysis of apoptosis of LSCs in wild type and *Alox5*<sup>-/-</sup> mice.** At day 14 after BMT, bone marrow cells were isolated from recipients of *BCR-ABL*-transduced bone marrow cells from wild type or *Alox5*<sup>-/-</sup> donor mice. The cells were stained with PI and Hoechst Blue, and the percentages of LT-LSCs (GFP<sup>+</sup>Lin<sup>-</sup>c-Kit<sup>+</sup>Sca-1<sup>+</sup>CD34<sup>-</sup>) and ST-LSCs /BCR-ABL-expressing MPP cells (Lin<sup>-</sup>c-Kit<sup>+</sup>Sca-1<sup>+</sup>CD34<sup>+</sup>) that were positive for PI and Hoechst Blue were determined by FACS. The ratios between ST-LSCs /BCR-ABL-expressing MPP cells and LT-LSCs in the presence and absence of *Alox5* were compared.



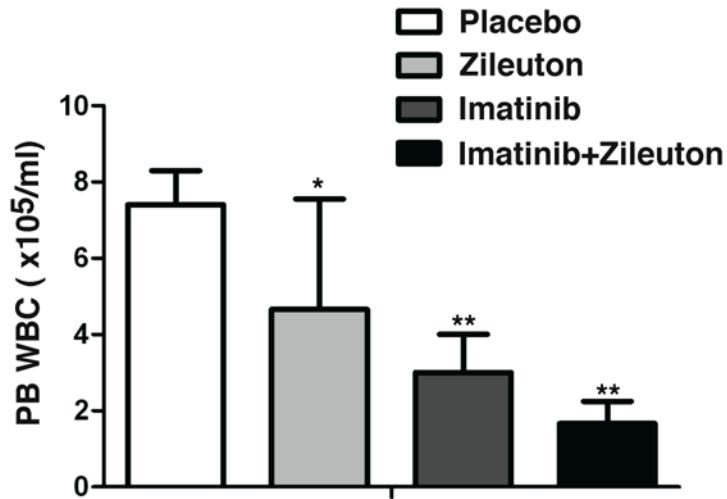

**Supplementary Fig. 8. Comparison of white blood cell (WBC) counts.** CML mice were treated with a placebo, Zileuton alone, imatinib alone, or both Zileuton and imatinib in combination as described in Figure 4b. WBCs were collected from the treated mice 14 days after induction of CML.

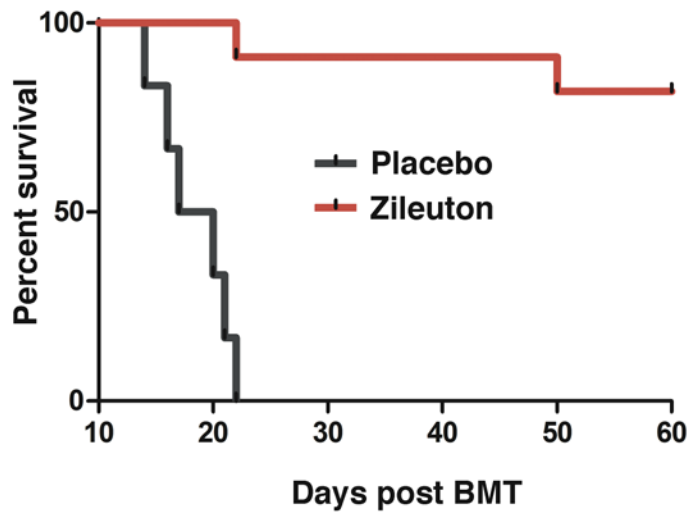

**Supplementary Fig. 9. Inhibition of Alox5 prolongs survival of mice with CML induced with BCR-ABL-T315I.** Kaplan-Meier survival curves for CML mice treated with a placebo (n=6), or Zileuton (n=11).

---

| Gene             | GeneBank accession | Forward primer                | Reverse primer            |
|------------------|--------------------|-------------------------------|---------------------------|
| $\beta$ -catenin | NM_007614          | 5'-AACAGGGTGCTATTCCACGACTA-3' | 5'-TGTGAACGTCCCGAGCAA-3'  |
| GATA-1           | NM_008089          | 5'-ACTGTGGAGCAACGGCTACT-3'    | 5'-TCCGCCAGAGTGTGTAGTG-3' |
| FOG-1            | NM_009569          | 5'-CATAGAGGAGCCCCAAGTC-3'     | 5'-GGCTGCCTCTTCTCCTTTT-3' |

---

**Supplementary Table. 1. Sequence of the primers used in real-time quantitative PCR assays.**
